# Supplementary material
Source: HighWire-hosted journal article supplement (https://rc.rcjournal.com/highwire/filestream/20859/field_highwire_adjunct_files/0/8793suppl1.docx)
Supplement: 8793suppl1.docx [file 8793suppl1.docx]

**Appendix A**

Mental Practice in the Initial Stages of Learning Bronchoscopy: a Randomized Controlled Trial

*Sample Interview Questionnaire:*

What did you find challenging about learning this new skill ?

Did you engage in the “Mental Practice”? Why? Why not?

How did you find it?

What was the impact of that short practice during your subsequent practice in VR simulator?

Would you change anything?
